# Supplementary material for: C1q+ tumor-associated macrophages contribute to immunosuppression through fatty acid metabolic reprogramming in malignant pleural effusion
Source: PubMed Central journal article supplement — J Immunother Cancer. 2023 Aug 21;11(8):e007441. doi: 10.1136/jitc-2023-007441 (PMC10445384; doi:10.1136/jitc-2023-007441), 2023-08-21
Supplement: jitc-2023-007441supp011.pdf [file jitc-2023-007441supp011.pdf]

**Table S1. Flow cytometry panels**

| Cell Subsets                      | Fluorescence |          |        |               |               |               |               |             |       |               |
|-----------------------------------|--------------|----------|--------|---------------|---------------|---------------|---------------|-------------|-------|---------------|
|                                   | APC-Cy7      | BV510    | FITC   | PE            | BV421         | APC           | PE-Cy7        | PerCP-Cy5.5 | BV605 | PE/Dazzle594  |
| Human TAMs-1                      | FVS          | CD45     | CD68   | C1q           | CD163         | Tim-3         | HLA-DR        | CX3CR1      | PD-L1 | —             |
| Human TAMs-2                      | FVS          | CD45     | CD68   | C1q           | IL-10         | TREM2         | PD-1          | CD206       | —     | —             |
| Human TAMs-3                      | FVS          | CD45     | CD68   | C1q           | TGF- $\beta$  | SIRP $\alpha$ | —             | —           | —     | —             |
| Human TAMs-4                      | FVS          | CD45     | MS4A4A | C1q           | CSF1R         | —             | —             | CD68        | —     | —             |
| Human TAMs + CD8 <sup>+</sup> T-1 | FVS          | Perforin | CD8    | IFN- $\gamma$ | Granzyme B    | CD45          | TNF- $\alpha$ | CD3         | CD8   | —             |
| Human TAMs + CD8 <sup>+</sup> T-2 | FVS          | CD45     | CD8    | —             | TIGIT         | —             | PD-1          | CD3         | —     | —             |
| Mouse TAMs-1                      | FVS          | CD45     | C1q    | F4/80         | MHCII         | TREM2         | CX3CR1        | CD11b       | PD-L1 | SIRP $\alpha$ |
| Mouse TAMs-2                      | FVS          | CD45     | C1q    | F4/80         | PD-1          | Tim-3         | —             | CD11b       | —     | —             |
| Mouse TAMs-3                      | FVS          | CD45     | C1q    | F4/80         | IL-10         | CD206         | —             | CD11b       | —     | —             |
| Mouse TAMs-4                      | FVS          | CD45     | C1q    | F4/80         | TGF- $\beta$  | —             | —             | CD11b       | —     | —             |
| Mouse TAMs + CD8 <sup>+</sup> T-1 | FVS          | CD45     | —      | Granzyme B    | TNF- $\alpha$ | Perforin      | IFN- $\gamma$ | CD3         | CD8   | —             |
| Mouse TAMs + CD8 <sup>+</sup> T-2 | FVS          | CD45     | —      | —             | TIGIT         | —             | PD-1          | CD3         | CD8   | —             |
| Mouse-T lymphocytes-1             | FVS          | CD45     | CD4    | —             | PD-1          | CD127         | CD25          | CD3         | CD8   | —             |
| Mouse-T lymphocytes-2             | FVS          | CD45     | —      | —             | TIGIT         | —             | IFN- $\gamma$ | CD3         | CD8   | —             |
| Mouse MDSC                        | FVS          | CD45     | —      | —             | —             | Gr-1          | —             | CD11b       | —     | —             |
