# Supplementary material for: C1q+ tumor-associated macrophages contribute to immunosuppression through fatty acid metabolic reprogramming in malignant pleural effusion
Source: PubMed Central journal article supplement — J Immunother Cancer. 2023 Aug 21;11(8):e007441. doi: 10.1136/jitc-2023-007441 (PMC10445384; doi:10.1136/jitc-2023-007441), 2023-08-21
Supplement: jitc-2023-007441supp012.pdf [file jitc-2023-007441supp012.pdf]

| REAGENT                                                        | SOURCE        | IDENTIFIER     |
|----------------------------------------------------------------|---------------|----------------|
| <b>Antibodies</b>                                              |               |                |
| Fixable Viability Stain 780                                    | BD Pharmingen | Cat# 565388    |
| Human TruStain FcX™                                            | Biolegend     | Cat# 422302    |
| Brilliant Violet 510™ anti-human CD45 Antibody                 | Biolegend     | Cat# 304036    |
| APC anti-human CD46 Antibody                                   | Biolegend     | Cat# 368511    |
| FITC anti-human CD68 Antibody                                  | Biolegend     | Cat# 333806    |
| FITC anti-human CD8 Antibody                                   | Biolegend     | Cat# 301050    |
| PerCP/Cyanine5.5 anti-human CD68 Antibody                      | Biolegend     | Cat# 333813    |
| Brilliant Violet 421™ anti-human LAP (TGF-β1) Antibody         | Biolegend     | Cat# 141407    |
| Brilliant Violet 421™ anti-human CD163 Antibody                | Biolegend     | Cat# 333612    |
| Brilliant Violet 421™ anti-human IL-10 Antibody                | Biolegend     | Cat# 501422    |
| PerCP/Cyanine5.5 anti-human CX3CR1 Antibody                    | Biolegend     | Cat# 341614    |
| PE/Cyanine7 anti-human HLA-DR Antibody                         | Elabscience®  | Cat# 327018    |
| Anti-Human Complement Component C1q, PE                        | Cedarlane     | Cat# CL7611PE  |
| Human/Mouse TREM2 APC-conjugated Antibody                      | R & D Systems | Cat# FAB17291A |
| PE/Cyanine7 anti-human CD279 (PD-1) Antibody                   | Biolegend     | Cat# 329918    |
| Brilliant Violet 605™ anti-human CD274 (B7-H1, PD-L1) Antibody | Biolegend     | Cat# 329724    |
| PerCP/Cyanine5.5 anti-human CD206 (MMR) Antibody               | Biolegend     | Cat# 321122    |
| APC anti-human CD366 (Tim-3) Antibody                          | Biolegend     | Cat# 345012    |
| APC anti-human CD172a (SIRPα) Antibody                         | Biolegend     | Cat# 372106    |
| PE/Cyanine7 anti-human TNF-α Antibody                          | Biolegend     | Cat# 502929    |
| PE anti-Human IFN-γ Antibody                                   | Biolegend     | Cat# 506507    |
| Brilliant Violet 510™ anti-human Perforin Antibody             | Biolegend     | Cat# 308119    |
| Brilliant Violet 421™ anti-human Granzyme B Antibody           | Biolegend     | Cat# 396414    |
| Brilliant Violet 421™ anti-human TIGIT(VSTM3) Antibody         | Biolegend     | Cat# 372709    |
| FITC anti-human CD14 Antibody                                  | Biolegend     | Cat# 325603    |
| Brilliant Violet 421™ anti-human CSF1R Antibody                | Biolegend     | Cat# 565347    |

|                                                                   |               |              |
|-------------------------------------------------------------------|---------------|--------------|
| Human MS4A4A Alexa Fluor®<br>488-conjugated Antibody              | R & D Systems | Cat#FAB7797G |
| CFSE                                                              | BD Pharmingen | Cat#565082   |
| TruStain FcX (anti-mouse CD16/32)                                 | Biolegend     | Cat#101320   |
| Brilliant Violet 510™ anti-mouse CD45<br>Antibody                 | Biolegend     | Cat#103138   |
| PerCP/Cyanine5.5 anti-mouse/human<br>CD11b Antibody               | Biolegend     | Cat#101228   |
| PE anti-mouse F4/80 Antibody                                      | Biolegend     | Cat#123110   |
| PE/Cyanine7 anti-mouse CX3CR1<br>Antibody                         | Biolegend     | Cat# 149015  |
| Brilliant Violet 421™ anti-mouse CD279<br>(PD-1) Antibody         | Biolegend     | Cat# 109121  |
| PE/Cyanine7 anti-mouse CD279 (PD-1)<br>Antibody                   | Biolegend     | Cat# 109110; |
| PE/Dazzle™ 594 anti-mouse CD172a<br>Antibody                      | Biolegend     | Cat#144016   |
| Brilliant Violet 605™ anti-mouse CD274<br>(B7-H1, PD-L1) Antibody | Biolegend     | Cat#124321   |
| Anti-Mouse Complement Component C1q,<br>FITC                      | Cedarlane     | Cat#CL7501F  |
| APC anti-mouse CD206 (MMR) Antibody                               | Biolegend     | Cat#141708   |
| Brilliant Violet 421™ anti-mouse I-A/I-E<br>Antibody              | Biolegend     | Cat#107632   |
| anti-mouse IL-10 Antibody                                         | Biolegend     | Cat# 505021  |
| Brilliant Violet 421™ anti-mouse LAP<br>(TGF-β1) Antibody         | Biolegend     | Cat#141407   |
| APC anti-mouse CD366 (Tim-3) Antibody                             | Biolegend     | Cat#119706   |
| PerCP/Cyanine5.5 anti-mouse CD3ε<br>Antibody                      | Biolegend     | Cat#100328   |
| FITC anti-mouse CD4 Antibody                                      | Biolegend     | Cat#100510   |
| Brilliant Violet 605™ anti-mouse CD8a<br>Antibody                 | Biolegend     | Cat#100743   |
| Brilliant Violet 421™ anti-human FOXP3<br>Antibody                | Biolegend     | Cat# 320124  |
| PE/Cyanine7 anti-mouse IFN-γ Antibody                             | Biolegend     | Cat#505826   |
| PE anti-mouse Granzyme B Antibody                                 | Biolegend     | Cat#372208   |
| APC anti-mouse Perforin Antibody                                  | Biolegend     | Cat#154404   |
| Brilliant Violet 421™ anti-mouse TNF-α<br>Antibody                | Biolegend     | Cat#506328   |
| APC anti-mouse Ly-6G/Ly-6C (Gr-1)<br>Antibody                     | Biolegend     | Cat#108412   |
| PE/Cyanine7 anti-mouse Ly-6C Antibody                             | BD Pharmingen | Cat# 560593  |

|                                                                  |               |                 |
|------------------------------------------------------------------|---------------|-----------------|
| Brilliant Violet 421™ anti-mouse TIGIT(Vstm3) Antibody           | Biolegend     | Cat#142111      |
| TIM3 Monoclonal antibody                                         | Proteintech®  | Cat# 60355-1-Ig |
| CD68 Monoclonal Antibody(KP1),eBioscience                        | Thermo Fisher | Cat# 14-0688-82 |
| FITC Anti-C1q antibody                                           | Abcam         | Cat# ab4223     |
| FABP5 antibody                                                   | Proteintech®  | Cat# 12348-1-AP |
| C1qA antibody                                                    | Proteintech®  | Cat# 67063-1-Ig |
| PPAR Gamma Polyclonal antibody                                   | Proteintech   | Cat# 16643-1-AP |
| PPAR Gamma Monoclonal antibody                                   | Proteintech   | Cat# 66936-1-Ig |
| Anti-CD68 antibody [KP1]                                         | Abcam         | Cat# ab955      |
| Anti-CD206 antibody                                              | Abcam         | Cat# ab64693    |
| Anti-FOXP3 antibody                                              | Abcam         | Cat# ab215206   |
| Anti-CD8 antibody                                                | Abcam         | Cat# ab209775   |
| <b>Chemicals, peptides, and recombinant proteins</b>             |               |                 |
| Anti-Mouse CD279 (PD-1)- Purified In vivo GOLD™ Functional Grade | Leinco        | Cat# P362       |
| SBFI26                                                           | Selleck       | Cat# S9957      |
| Cell Activation Cocktail (with Brefeldin A)                      | Biolegend     | Cat# 423304     |
| pHrodo Green E coli BioParticles                                 | Invitrogen    | Cat# P35366     |
| BODIPY 493/503                                                   | Cayman        | Cat# 25892      |
| Collagenase, type IV                                             | Servicebio    | Cat# GC305015   |
| Lymphoprep™                                                      | STEMCELL      | Cat# 7851       |
| EasySep Mouse CD8a Positive Selection Kit II                     | STEMCELL      | Cat# 18001      |
| EasySep Mouse F4/80 Positive Selection Kit                       | STEMCELL      | Cat# 100-0659   |
| EasySep Human CD14 Positive Selection Kit II                     | STEMCELL      | Cat# 17858      |
| EasySep Human CD8 Positive Selection Kit II                      | STEMCELL      | Cat# 17853      |
| Dual Luciferase Reporter Gene Assay Kit                          | Vazyme        | Cat# DL101-01   |
| Protease inhibitor                                               | Servicebio    | Cat# G2006      |
| PMSF                                                             | Servicebio    | Cat# G2008      |
| RIPA Lysis Buffer                                                | Servicebio    | Cat# G2002      |
| TRIzol reagent                                                   | TAKARA        | Cat# 9109       |
| Invitrogen™ eBioscience™ IC Fixation Buffer                      | Invitrogen    | Cat# 00-8222-49 |
| Foxp3/Transcription Factor Staining Buffer                       | eBioscience   | Cat# 00-5523-00 |

|                                                         |                                                              |                                                                 |
|---------------------------------------------------------|--------------------------------------------------------------|-----------------------------------------------------------------|
| Set                                                     |                                                              |                                                                 |
| Hiscript qRT-PCR SuperMix                               | Vazyme                                                       | Cat# R122-01                                                    |
| AceQ qPCR SYBR Green Master Mix                         | Vazyme                                                       | Cat# Q111-02                                                    |
| Lipofectamine 3000                                      | Thermo Fisher                                                | Cat# L3000150                                                   |
| D-luciferin, Potassium Salt                             | Maokangbio                                                   | Cat# MX4603                                                     |
| Dual Luciferase Reporter Assay Kit                      | Vazyme                                                       | Cat# DL101-01                                                   |
| BCA Protein Assay Kit                                   | Beyotime                                                     | Cat# P0012                                                      |
| SimpleChIP® Enzymatic Chromatin IP Kit (Magnetic Beads) | Cell signaling technology                                    | Cat# 9003                                                       |
| <b>Deposited data</b>                                   |                                                              |                                                                 |
| Data files for human scRNA-seq                          | This paper                                                   | GEO:                                                            |
| Human non-small cell lung cancer scRNA-seq              | ( Zilionis et al., 2019)                                     | GEO: GSE127465                                                  |
| Human kidney renal clear cell carcinoma scRNA-seq       | ( Yu et al., 2023)                                           | GEO: GSE207493                                                  |
| Human colorectal cancer scRNA-seq                       | ( Zhang et al., 2020)                                        | GEO: GSE146771                                                  |
| <b>Experimental models: cell lines</b>                  |                                                              |                                                                 |
| LLC-LUC                                                 | ATCC                                                         | ATCC, CRL-1642-LUC2                                             |
| LLC                                                     | ATCC                                                         | ATCC, CRL-1642                                                  |
| <b>Experimental models: organisms/strains</b>           |                                                              |                                                                 |
| C57BL/6 mice                                            | Beijing Vital River Experimental Animal Technology Co., Ltd. | N/A                                                             |
| <b>Software and algorithms</b>                          |                                                              |                                                                 |
| FlowJo V10                                              | Tree Star                                                    | N/A                                                             |
| Prism 8                                                 | GraphPad                                                     | N/A                                                             |
| R studio                                                | RStudio. Inc., Boston, MAReference                           | <a href="https://www.rstudio.com/">https://www.rstudio.com/</a> |
