# Supplementary material for: C1q+ tumor-associated macrophages contribute to immunosuppression through fatty acid metabolic reprogramming in malignant pleural effusion
Source: PubMed Central journal article supplement — J Immunother Cancer. 2023 Aug 21;11(8):e007441. doi: 10.1136/jitc-2023-007441 (PMC10445384; doi:10.1136/jitc-2023-007441), 2023-08-21
Supplement: jitc-2023-007441supp013.pdf [file jitc-2023-007441supp013.pdf]

**Table S2. Primer sequences for ChIP**

| <b>Genes</b>     | <b>Sequence (5' to 3')</b> |
|------------------|----------------------------|
| TREM2-F          | GCTTAGTAGTTGCCAGGCC        |
| TREM2-R          | CAACCACCACAATCACCATGT      |
| HAVCR2 (Tim-3)-F | GGAAGTGTGGCCAAAAGGAACAT    |
| HAVCR2 (Tim-3)-R | ACATGCATGGCTCTCTGTTCTAA    |
| SIRP $\alpha$ -F | CATGGGGACAGATTCTGGGGA      |
| SIRP $\alpha$ -R | AGACAAAAGAGCCGAGTTGC       |
| CD274 (PD-L1)-F  | AGTACCTGTAAACTGTATTGCCAC   |
| CD274 (PD-L1)-R  | GGGTGACTTCCCAAAGTTCC       |
| CD279 (PD-1)-F   | TAAGCAAGCCATTTACAAAACGC    |
| CD279 (PD-1)-R   | CCCCTCCAGCCTTGACCTT        |
