# Supplementary material for: C1q+ tumor-associated macrophages contribute to immunosuppression through fatty acid metabolic reprogramming in malignant pleural effusion
Source: PubMed Central journal article supplement — J Immunother Cancer. 2023 Aug 21;11(8):e007441. doi: 10.1136/jitc-2023-007441 (PMC10445384; doi:10.1136/jitc-2023-007441), 2023-08-21
Supplement: jitc-2023-007441supp014.pdf [file jitc-2023-007441supp014.pdf]

**Table S3. Primer sequences for qPCR**

| <b>Genes</b>     | <b>Sequence (5' to 3')</b> |
|------------------|----------------------------|
| <b>Human</b>     |                            |
| CD274 (PD-L1)-F  | CTGGCATTGCTGAACGCATTT      |
| CD274 (PD-L1)-R  | TCCTTCCTCTTGTCACGCTCA      |
| SIRP $\alpha$ -F | GCATGAGCCCGAGAAGAATGC      |
| SIRP $\alpha$ -R | GACCCAAGGAAGCAGAGGGTT      |
| CD279 (PD-1)-F   | TGACTTCCACATGAGCGTGGT      |
| CD279 (PD-1)-R   | TGGCTCCTATTGTCCCTCGTG      |
| HAVCR2 (Tim-3)-F | GGGACTCTGGAGCAACCATCA      |
| HAVCR2 (Tim-3)-R | AAGCGCCGAAGATAAGAGCCA      |
| TREM2-F          | AGCACAGCCATCACAGACGAT      |
| TREM2-R          | GAAAGATGCAGGCCAGGAGGA      |
| FABP5-F          | AGGAGTGGGAATAGCTTTGCG      |
| FABP5-R          | TGATGCTGAACCAATGCACCA      |
| PPAR $\gamma$ -F | GCCTGCATTTCTGCATTCTGCT     |
| PPAR $\gamma$ -R | GGAGTGGGAGTGGTCTTCCAT      |
| GAPDH-F          | ACTCCTCCACCTTTGACGCT       |
| GAPDH-R          | CACCCTGTTGCTGTAGCCAAAT     |
| <b>Mouse</b>     |                            |
| CD274 (PD-L1)-F  | CGGACTACAAGCGAATCACGC      |
| CD274 (PD-L1)-R  | CGGGTTGGTGGTCACTGTTTG      |
| SIRP $\alpha$ -F | TATCACGGAATGACACGCCCA      |

|                  |                        |
|------------------|------------------------|
| SIRP $\alpha$ -R | GGCAAATCCCAGCACGGTATG  |
| CD279 (PD-1)-F   | AACCAGCAGAGCTAGAGCCAC  |
| CD279 (PD-1)-R   | AGAGCCAGAACCCAACTCCAG  |
| HAVCR2 (Tim-3)-F | TGGGACATACGAAGGCAGAGC  |
| HAVCR2 (Tim-3)-R | TGGGACATACGAAGGCAGAGC  |
| TREM2-F          | ATCGCAGATGACACCCTTGCT  |
| TREM2-R          | TGGAGGTGCTGTGTTCCACTT  |
| FABP5-F          | ACGGTCTGCACCTTCCAAGA   |
| FABP5-R          | AGCCCTCATTGCACCTTCTCA  |
| PPAR $\gamma$ -F | CGCCAAGGTGCTCCAGAAGAT  |
| PPAR $\gamma$ -R | CGGGTGGGACTTTCCTGCTAAT |
| GAPDH-F          | ACTCTTCCACCTTCGATGCCG  |
| GAPDH-R          | AGGGAGATGCTCAGTGTTGGG  |
