# Supplementary figures and images for: C1q+ tumor-associated macrophages contribute to immunosuppression through fatty acid metabolic reprogramming in malignant pleural effusion
Source: PubMed Central journal article supplement — J Immunother Cancer. 2023 Aug 21;11(8):e007441. doi: 10.1136/jitc-2023-007441 (PMC10445384; doi:10.1136/jitc-2023-007441), 2023-08-21

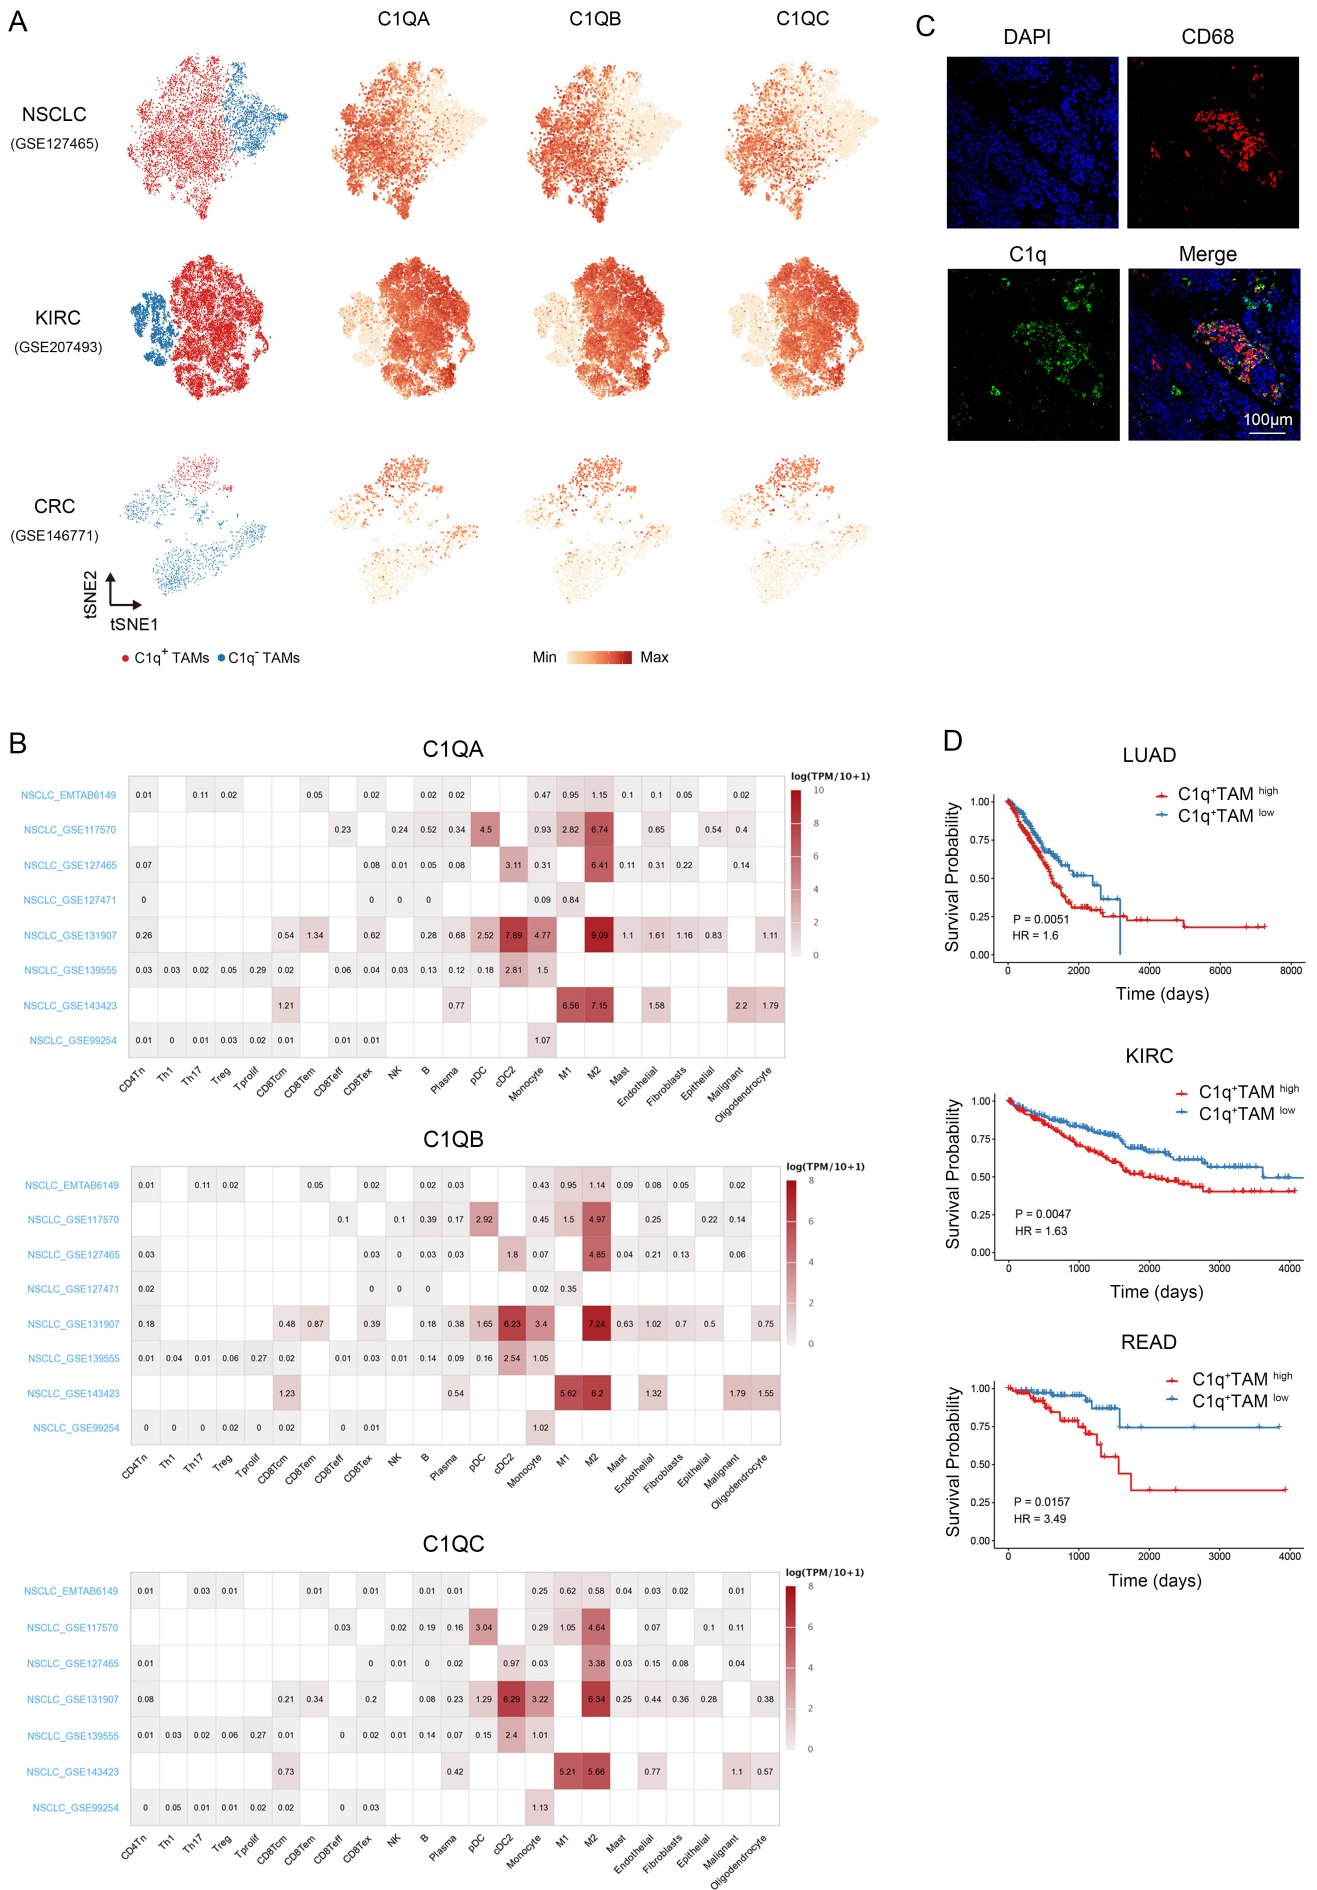

Supplement: jitc-2023-007441supp002.pdf [file jitc-2023-007441supp002.pdf]

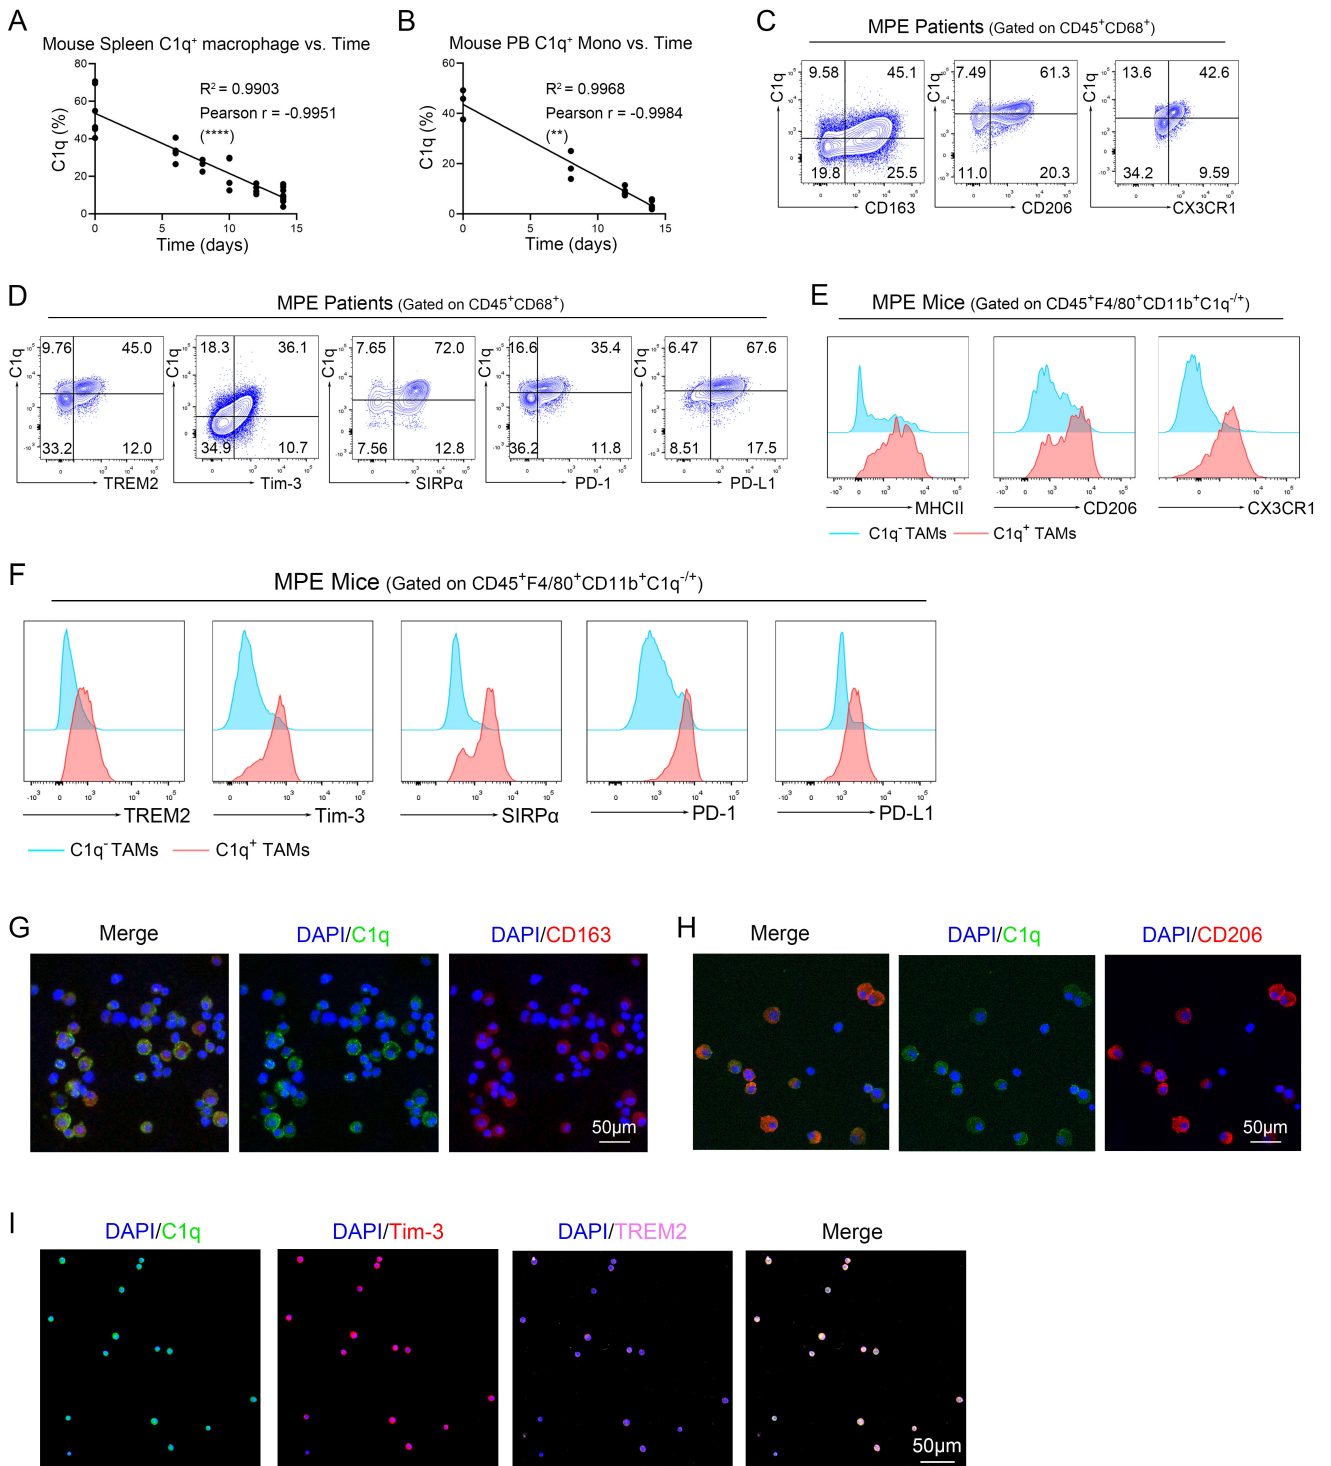

Supplement: jitc-2023-007441supp003.pdf [file jitc-2023-007441supp003.pdf]

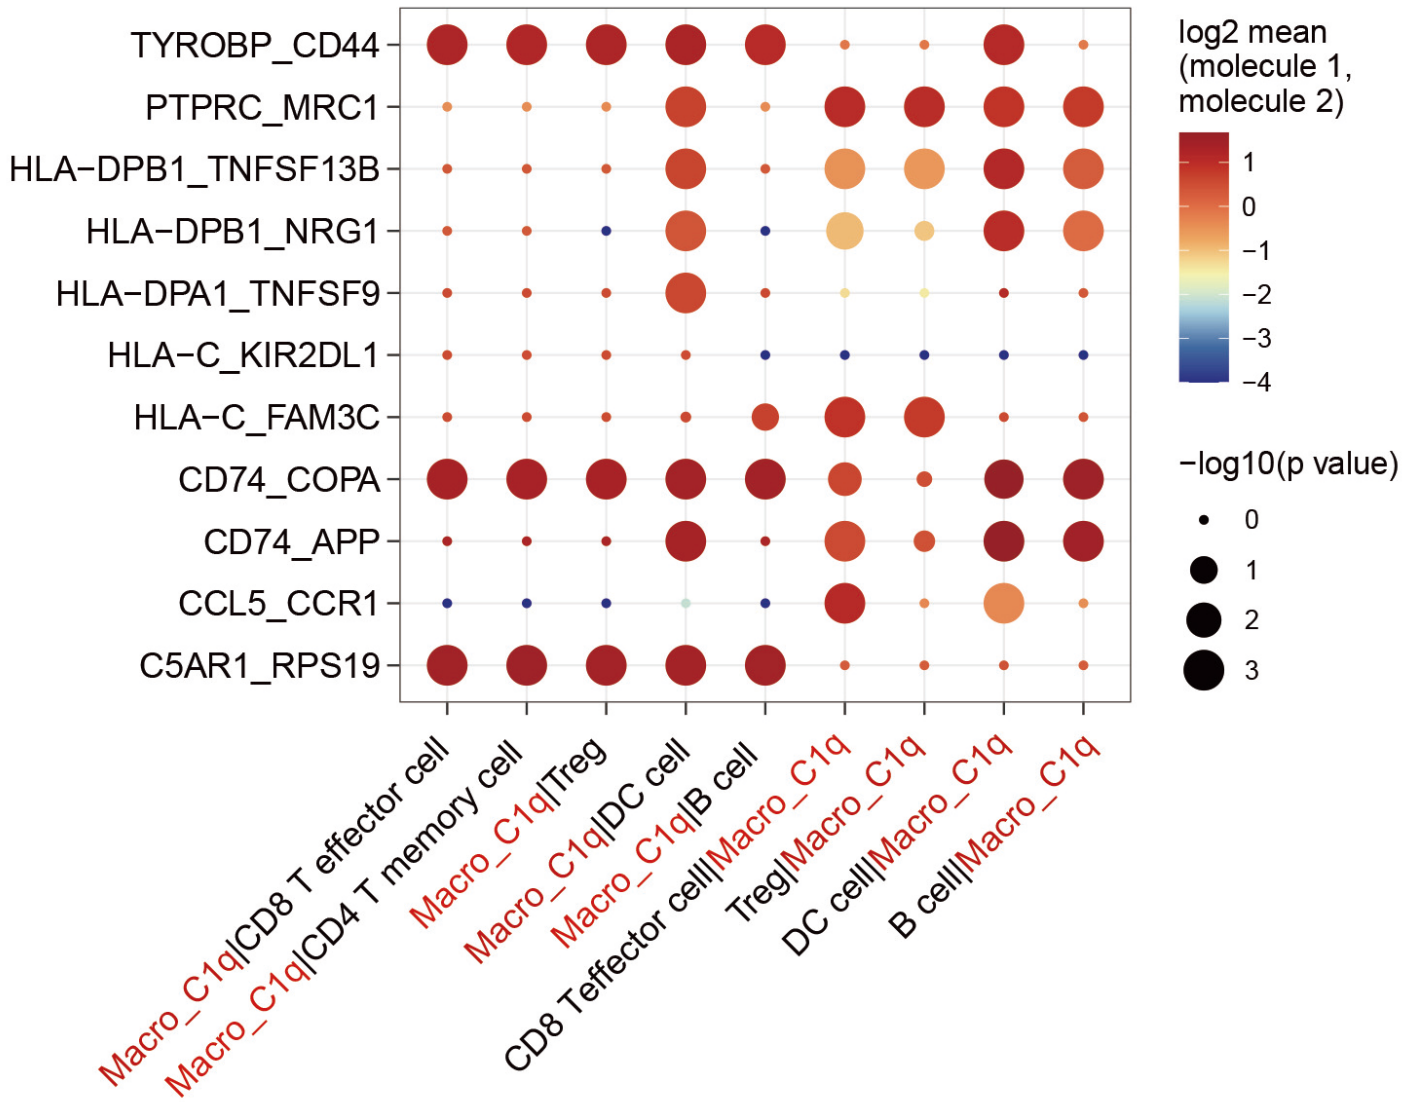

Supplement: jitc-2023-007441supp004.pdf [file jitc-2023-007441supp004.pdf]

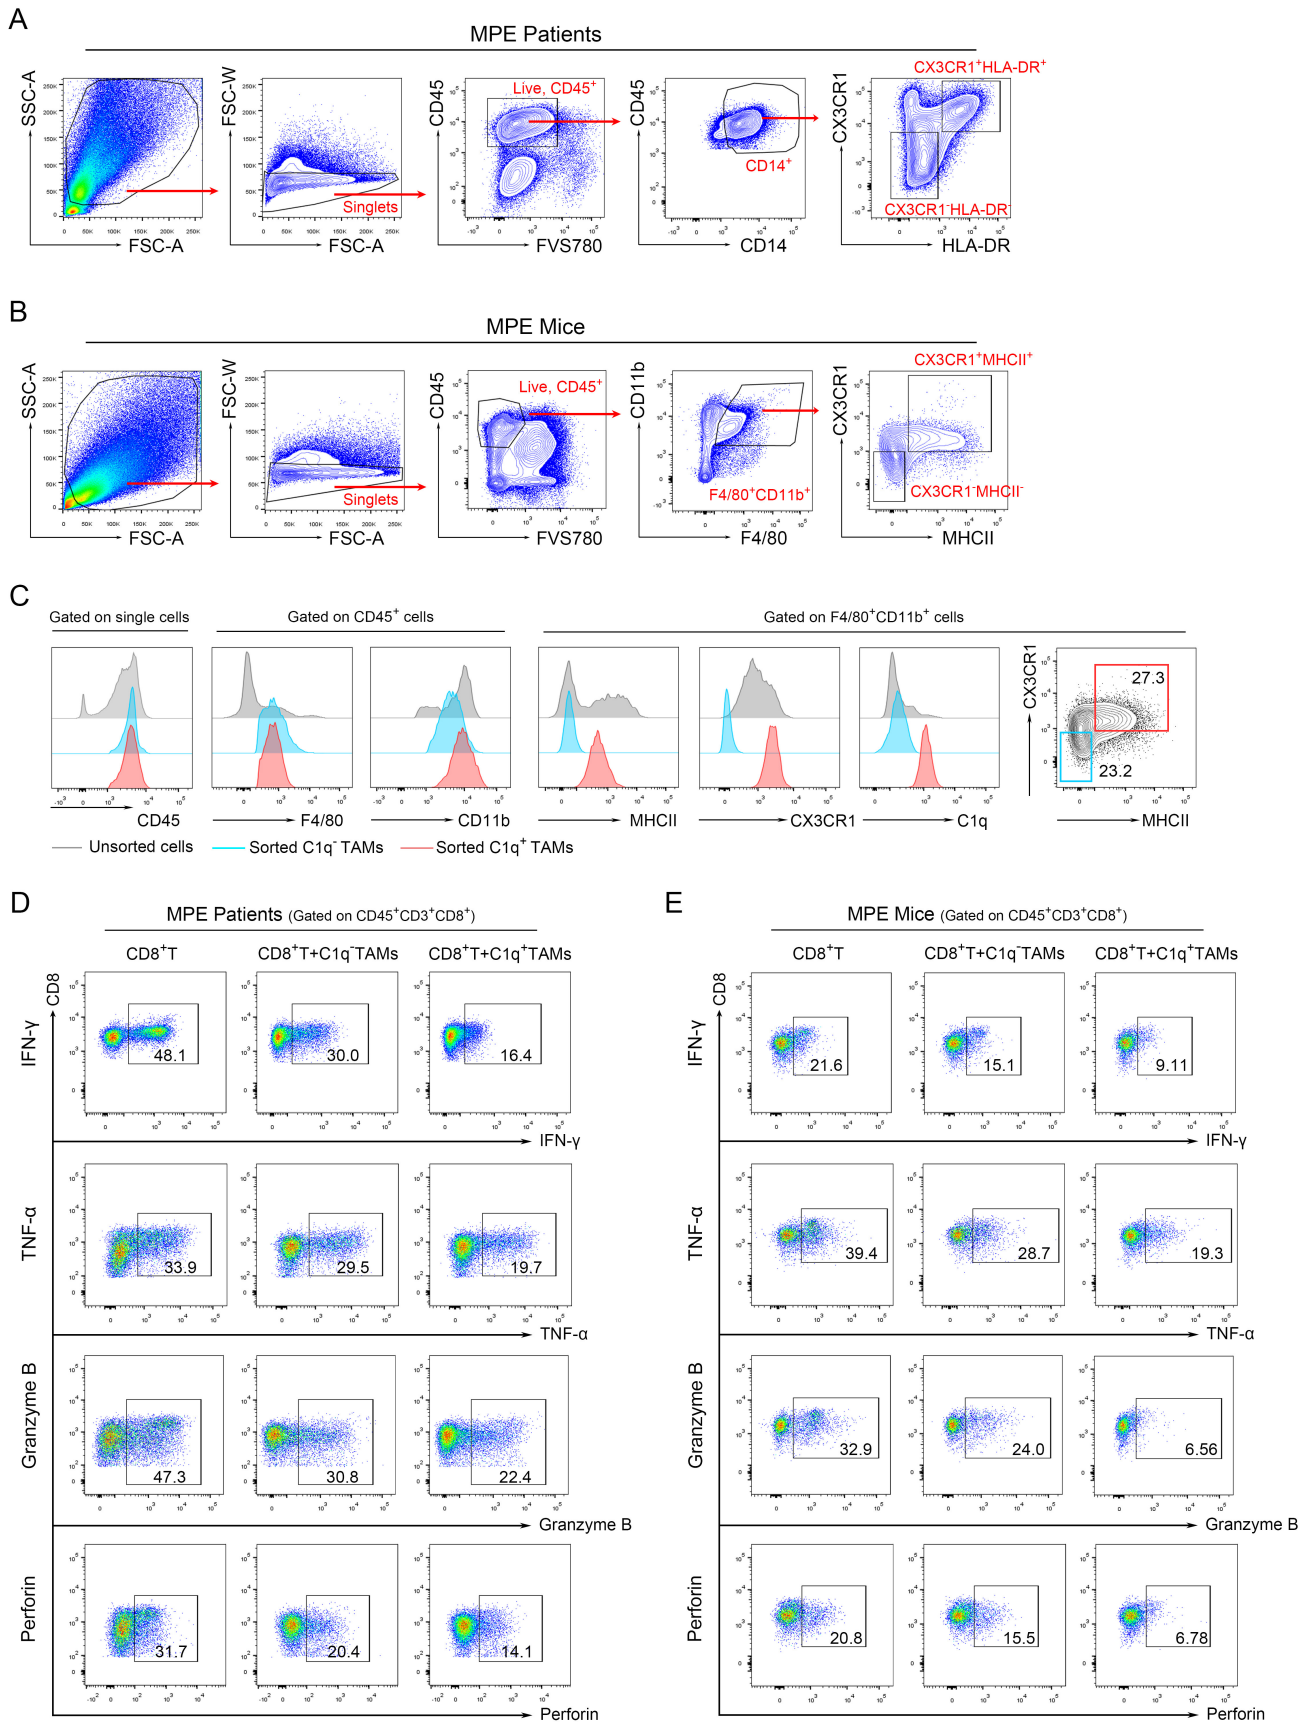

Supplement: jitc-2023-007441supp005.pdf [file jitc-2023-007441supp005.pdf]

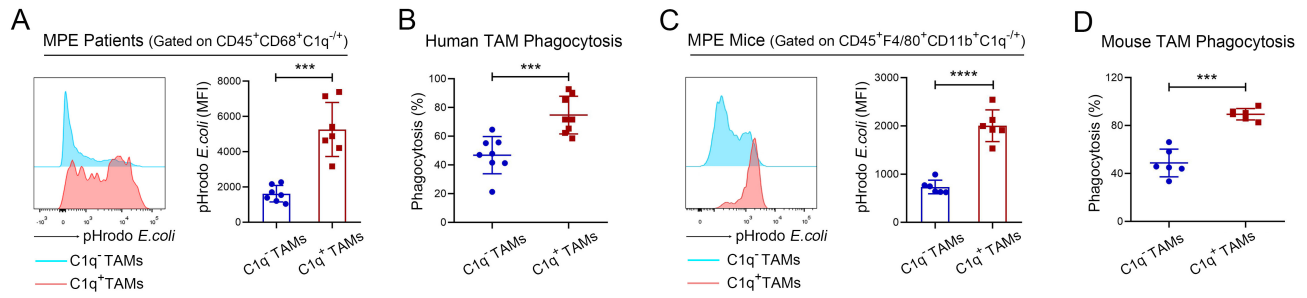

Supplement: jitc-2023-007441supp006.pdf [file jitc-2023-007441supp006.pdf]

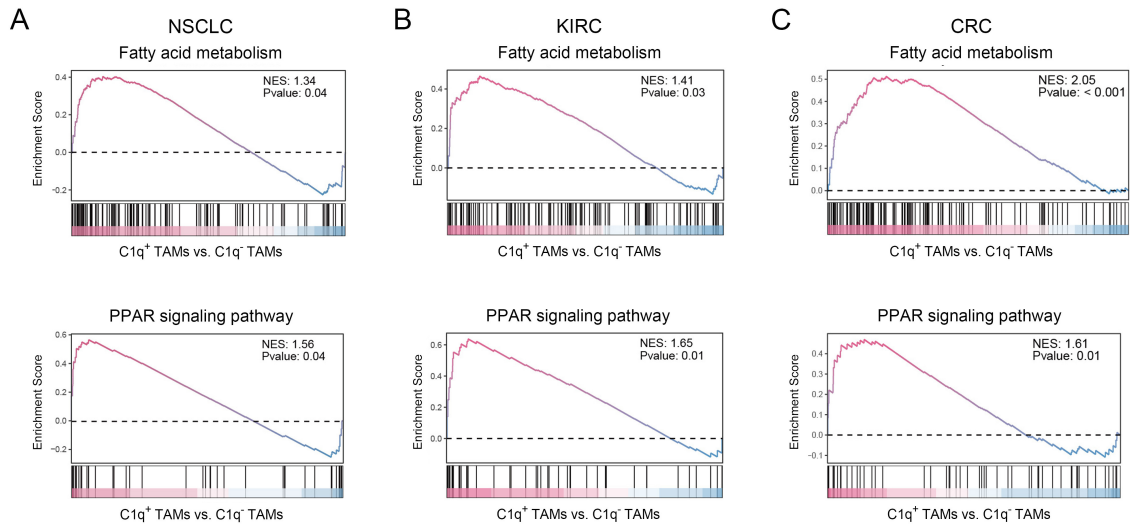

Supplement: jitc-2023-007441supp007.pdf [file jitc-2023-007441supp007.pdf]

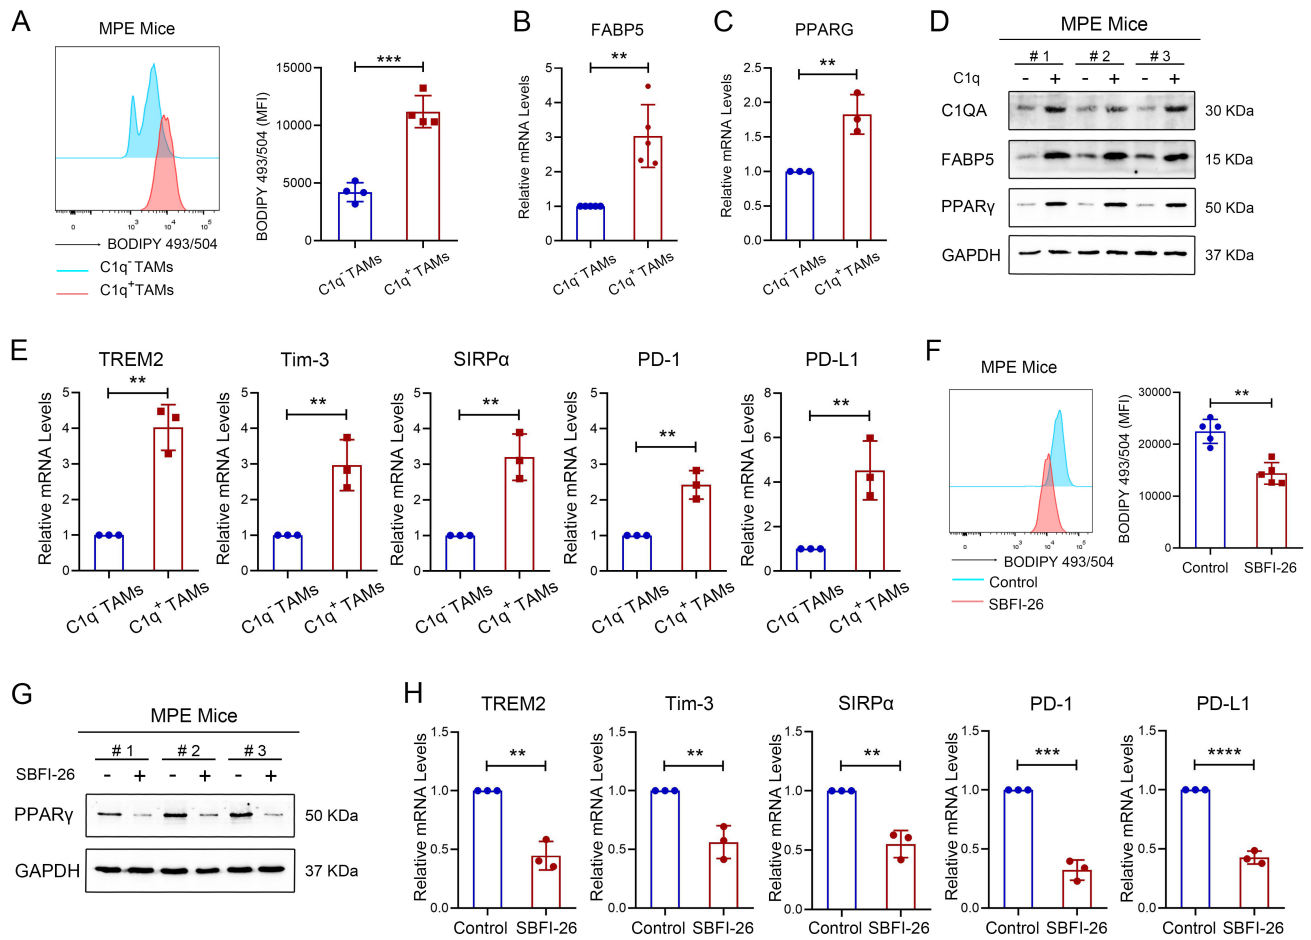

Supplement: jitc-2023-007441supp008.pdf [file jitc-2023-007441supp008.pdf]

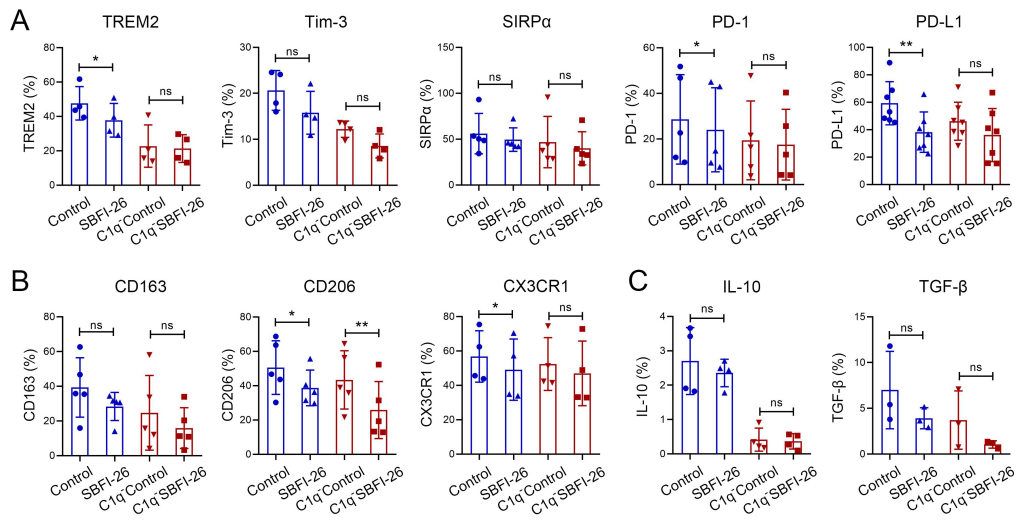

Supplement: jitc-2023-007441supp009.pdf [file jitc-2023-007441supp009.pdf]

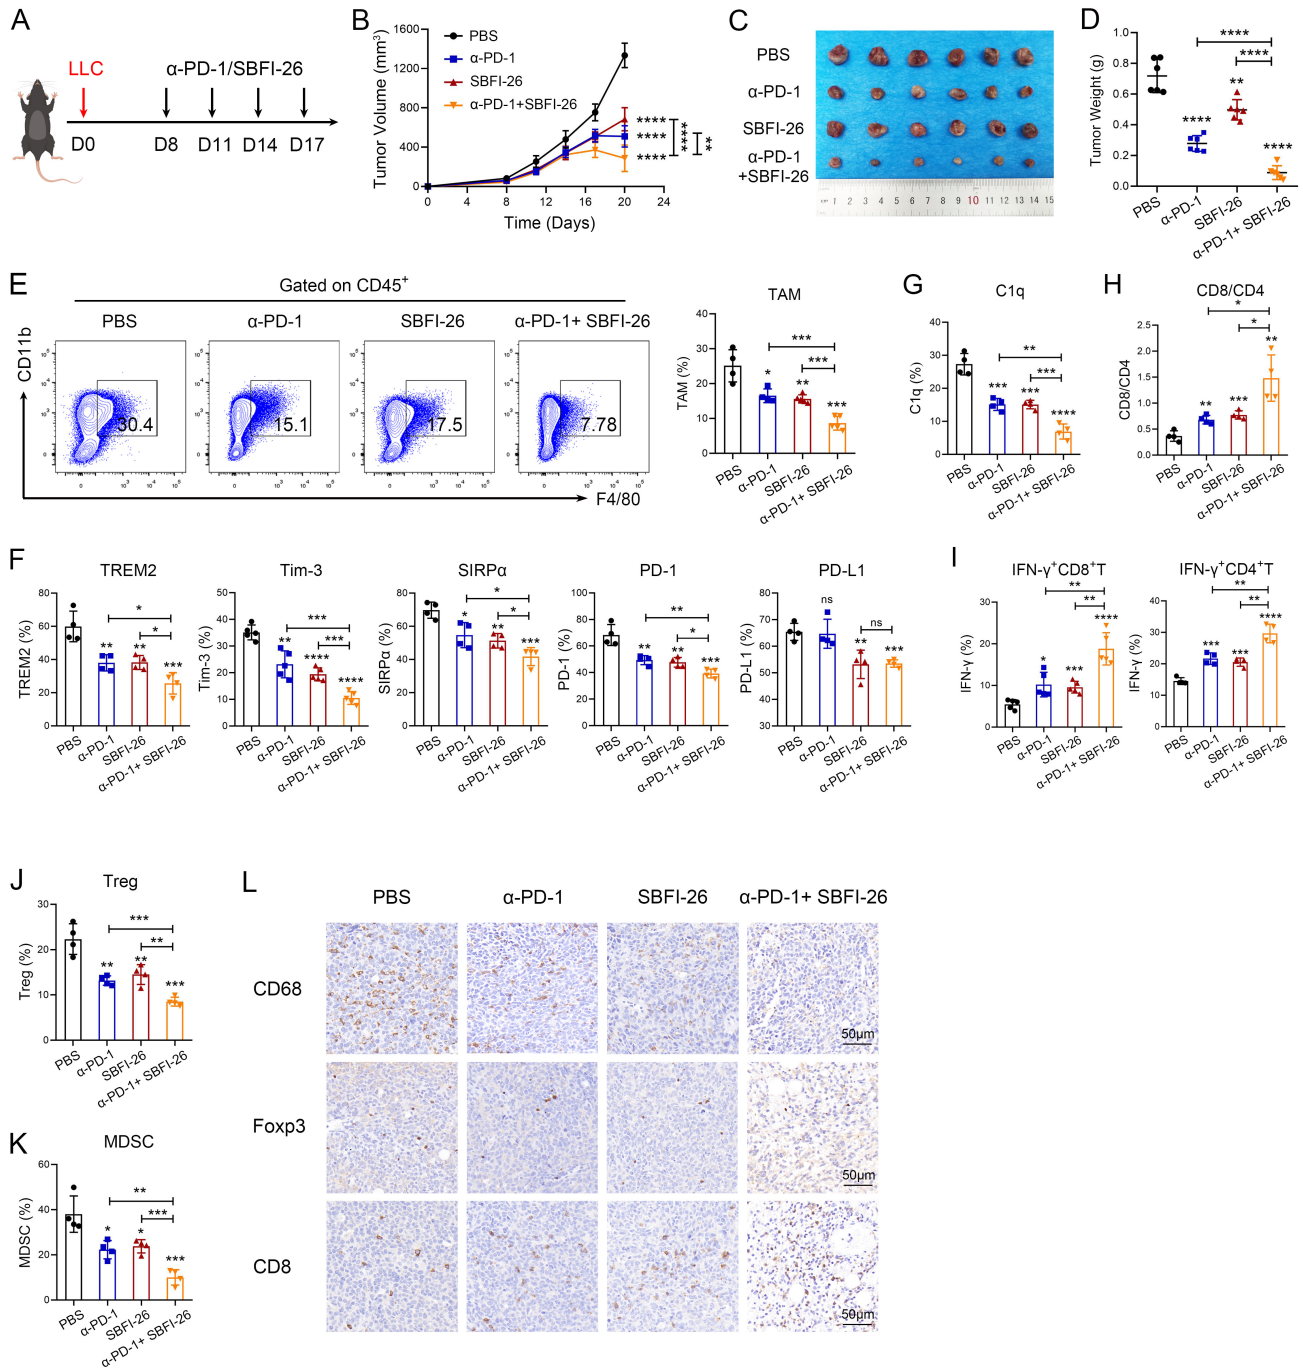

Supplement: jitc-2023-007441supp010.pdf [file jitc-2023-007441supp010.pdf]

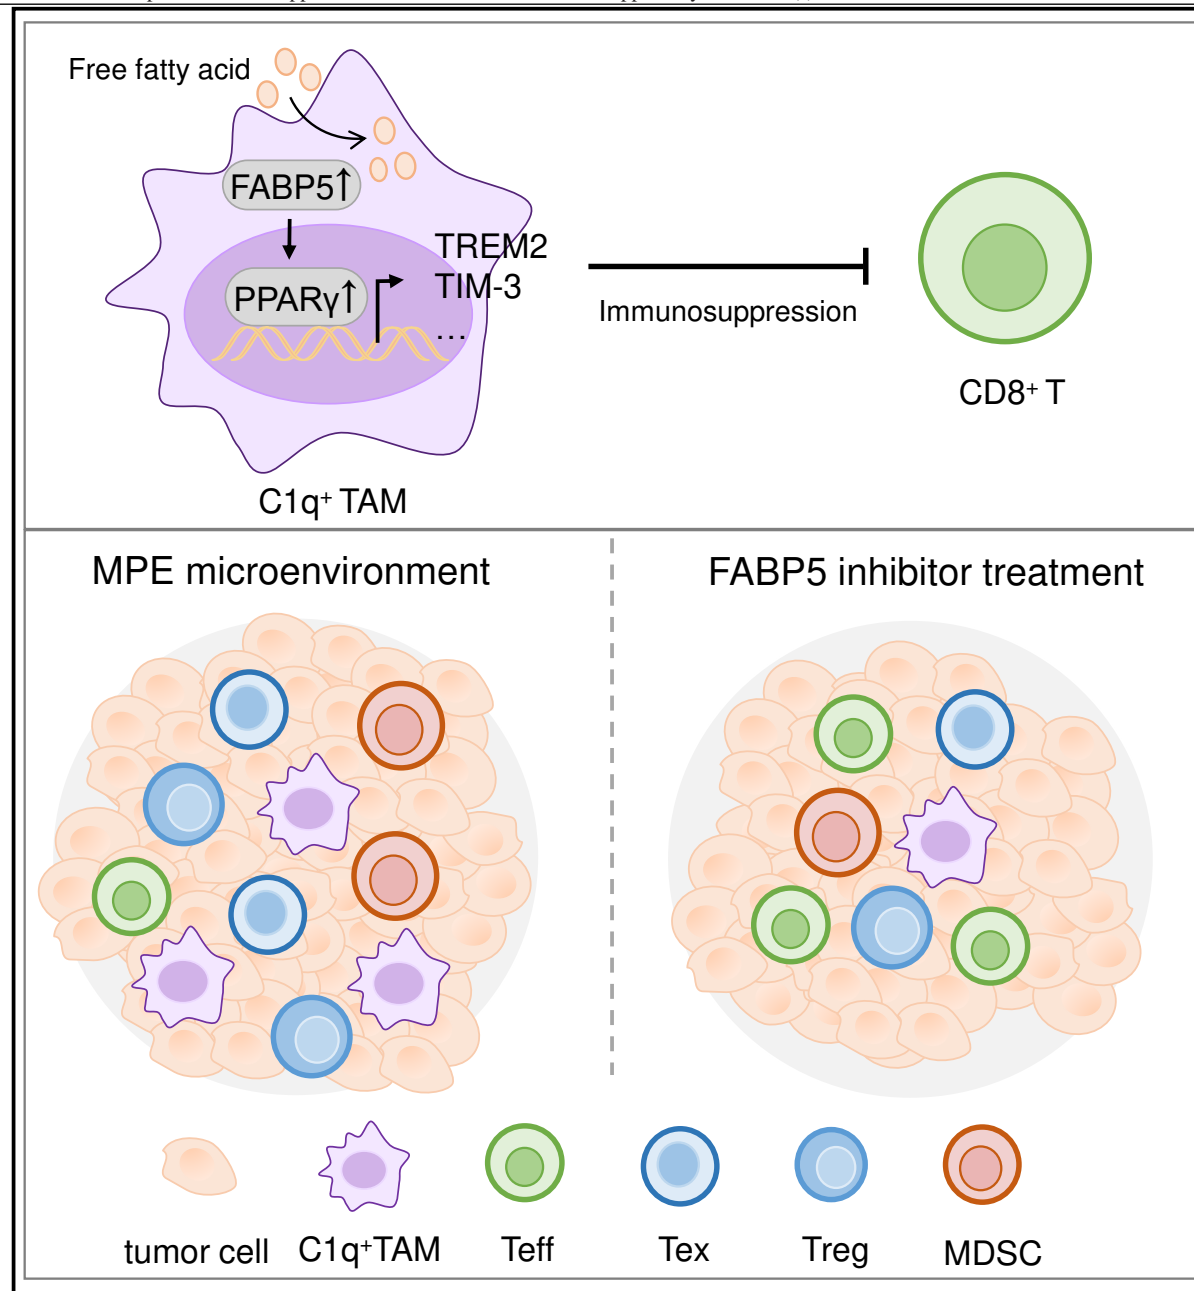

Supplement: jitc-2023-007441supp016.pdf [file jitc-2023-007441supp016.pdf]
